# Supplementary material for: Targeting Root Cause by Systemic scAAV9-hIDS Gene Delivery: Functional Correction and Reversal of Severe MPS II in Mice
Source: PubMed Central journal article supplement — Mol Ther Methods Clin Dev. 2018 Sep 4;10:327–40. doi: 10.1016/j.omtm.2018.07.005 (PMC6125796; doi:10.1016/j.omtm.2018.07.005), 2018-09-04
Supplement: mmc1.pdf [file mmc1.pdf]

OMTM, Volume 10

## **Supplemental Information**

**Targeting Root Cause by Systemic scAAV9-hIDS**

**Gene Delivery: Functional Correction**

**and Reversal of Severe MPS II in Mice**

**Haiyan Fu, Kim Zaraspe, Naoko Murakami, Aaron S. Meadows, Ricardo J. Pineda, Douglas M. McCarty, and Joseph Muenzer**

**Figure S1**

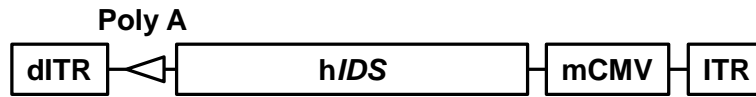

**Figure S1. scAAV9-mCMV-hIDS vector genome. ITR:** wt AAV2 terminal repeat; **dITR:** AAV2 terminal repeat with deletion of terminal resolution site to force generation of self-complementary dimeric genomes; **mCMV:** a truncated 173bp mini CMV promoter; **hIDS:** human iduronate sulfatase coding region cDNA; **Poly A:** SV40 polyadenylation signal.

## Supplementary Figure S2

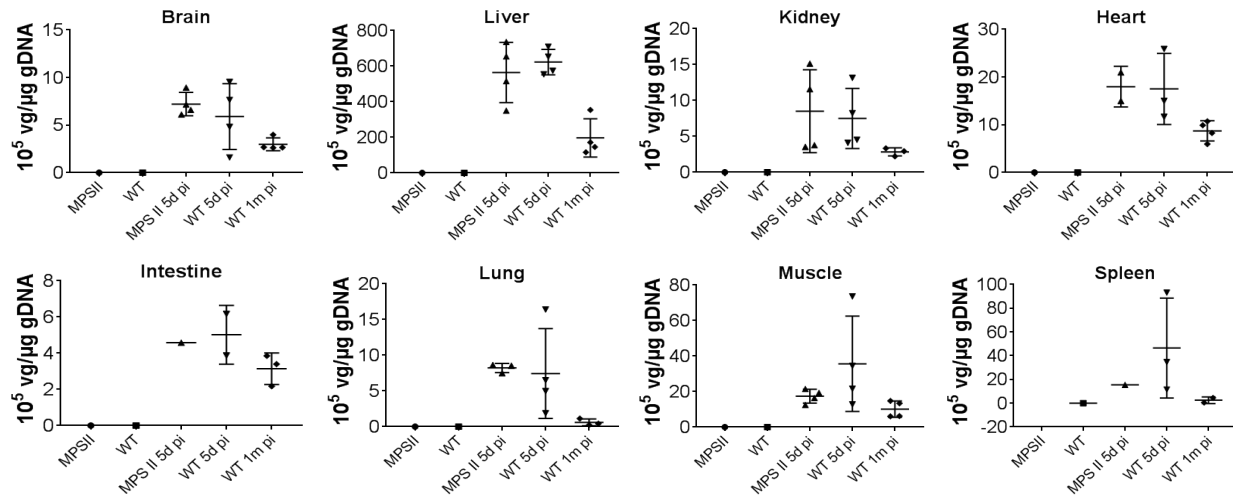

**Supplementary Figure S2 Differential biodistribution of systemically delivered scAAV9-mCMV-hIDS vector in MPS II and WT mice.** MPS II and WT mice were treated at age 1-2m with an IV injection of  $5 \times 10^{13}$  vg/kg scAAV9-mCMV-hIDS. Tissues were assayed by qPCR for scAAV9-hIDS vector genome at 5 days or 1m pi (n=4/group).

| Table S1. Tumor incidence in AAV9-treated MPS II and non-treated WT mice at endpoints |        |                      |                   |              |        |                                             |                                        |
|---------------------------------------------------------------------------------------|--------|----------------------|-------------------|--------------|--------|---------------------------------------------|----------------------------------------|
| Mouse ID #                                                                            | GT     | Vector dose (vg/kg)  | Injection age (m) | Test age (m) | Tumors |                                             | 10 <sup>5</sup> vg/ $\mu$ g gDNA       |
|                                                                                       |        |                      |                   |              | Gross  | Microscopic <sup>#</sup>                    |                                        |
| 855                                                                                   | MPS II | 2.5x10 <sup>12</sup> | 1                 | 20           | Liver  | ND*                                         | 0.405 (T1)<br>6.850 (T2)               |
| 858                                                                                   | MPS II | 2.5x10 <sup>12</sup> | 1                 | 21           | Liver  | ND*                                         | 0.366 (T1)<br>9.550 (T2)<br>0.021 (T3) |
| 870                                                                                   | MPS II | 2.5x10 <sup>12</sup> | 1                 | 26           | Liver  | NE**                                        | 15.2 (T1)<br>0.396 (T2)                |
| 882                                                                                   | MPS II | 2.5x10 <sup>12</sup> | 1                 | 21           | No     | Histiocytic sarcoma (liver, spleen)         | N/A                                    |
| 151                                                                                   | MPS II | 5x10 <sup>12</sup>   | 1                 | 25           | Liver  | NE**                                        | 2.92                                   |
| 173                                                                                   | MPS II | 5x10 <sup>12</sup>   | 1                 | 16           | No     | Histiocytic sarcoma (liver, Kidney, spleen) | N/A                                    |
| 206                                                                                   | MPS II | 5x10 <sup>12</sup>   | 1                 | 16           | Liver  | ND*                                         | 1.47                                   |
| 235                                                                                   | MPS II | 5x10 <sup>12</sup>   | 1                 | 25           | Liver  | ND*                                         | 1.42 (T1)<br>0.785 (T2)                |
| 429                                                                                   | MPS II | 5x10 <sup>12</sup>   | 3                 | 17           | Liver  | ND*                                         | 8.220 (T1)<br>5.07 (T2)                |
| 691                                                                                   | MPS II | 5x10 <sup>12</sup>   | 6                 | 22           | Liver  | ND*                                         | 8.60 (T1)<br>1.00 (T2)<br>1.23 (T3)    |
| 1027                                                                                  | MPS II | 1x10 <sup>13</sup>   | 6                 | 23           | Liver  | NE**                                        | 0.712 (T1)<br>0.943 (T2)               |
| 1035                                                                                  | MPS II | 1x10 <sup>13</sup>   | 6                 | 25           | Liver  | NE**                                        | 1.592                                  |
| 1036                                                                                  | MPS II | 1x10 <sup>13</sup>   | 6                 | 21           | Liver  | ND*                                         | 1.611                                  |
| 1132                                                                                  | MPS II | 2x10 <sup>13</sup>   | 6                 | 21           | Liver  | ND*                                         | 21.9 (T1)<br>20.7 (T2)                 |
| 1062                                                                                  | MPS II | 2x10 <sup>13</sup>   | 9                 | 21           | Liver  | ND*                                         | 1.20 (T1)<br>38.5 (T2)                 |
| 148                                                                                   | WT     | NT                   | N/A               | 29           | Liver  | Histiocytic sarcoma (liver, Kidney, lung)   | 9 tumors, NE**                         |
| 294                                                                                   | WT     | NT                   | N/A               | 28           | Liver  | ND*                                         | <0.001                                 |
| 677                                                                                   | WT     | NT                   | N/A               | 24           | Liver  | ND*                                         | ND*                                    |
| 53                                                                                    | WT     | NT                   | N/A               | 26           | Liver  | NE**                                        | <0.001(T1)<br><0.001(T2)               |
| 862                                                                                   | WT     | NT                   | N/A               | 26           | Liver  | NE**                                        | <0.001                                 |
| 316                                                                                   | WT     | NT                   | N/A               | 30           | Liver  | NE**                                        | <0.001(T1)<br><0.001(T2)<br><0.001(T3) |
| 332                                                                                   | WT     | NT                   | N/A               | 23           | Liver  | NE**                                        | <0.001                                 |
| 294                                                                                   | WT     | NT                   | N/A               | 28           | Liver  | NE**                                        | <0.001                                 |
| 402                                                                                   | WT     | NT                   | N/A               | 28           | Liver  | NE**                                        | ND*                                    |

<sup>#</sup>: Histopathology examination on H&E-stained non-tumor tissues; \*ND: not detected; \*\*NE: not examined.
